# Supplementary material for: Water striders adjust leg movement speed to optimize takeoff velocity for their morphology
Source: PubMed Central journal article supplement (PMC5150985; doi:10.1038/ncomms13698), 2016-12-07
Supplement: ncomms13698-s1.pdf [file ncomms13698-s1.pdf]

1 **Supplementary Figures**

2

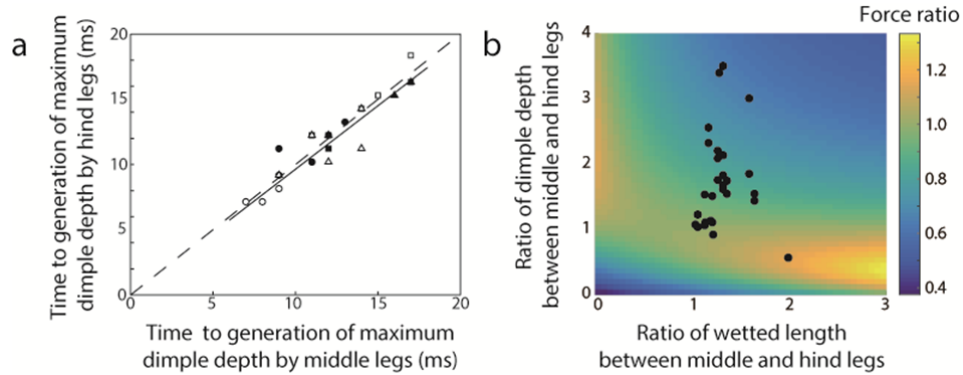

3

4

5

6

7

8

9

10

11

12

13

14

15

16

17

18

19

20

21

22

23

**Supplementary Figure 1. Validation of synchronous motion of four legs** (a) Comparison of the moment of maximum depth of dimple generation  $t_m$  between middle and hind legs. The correlation in each trial results in the correlation coefficient  $r = 0.943$ , p-value = 0.0311, and  $df = 28$  implying the synchronous motion of four legs. Data from the jump of females (filled symbols) and males (unfilled symbols) of *G. remigis* (inverted triangles), *G. comatus* (diamonds), *G. latiabdominis* (circles), *G. gracilicornis* (triangles), and *A. paludum* (squares) with nymph of *G. remigis* (stars) are plotted. The dashed line indicates the exact match between middle and hind legs, and the solid line the fitted regression line. (b) The ratio of the force calculated with mean values of the wetted length and dimple depth of middle and hind legs to the force with different values of the wetted length and dimple depth of middle and hind legs, as a function of the ratio of wetted lengths and dimple depths made by middle and hind legs. The black dots indicate the observed jumps of water striders. The observed conditions have force ratios between 0.76 and 1.15 implying that our simplification is reasonable, except for the three cases with the highest dimple depth ratio, where the maximum dimple depths made by hind legs were below 1 mm and the resulting force ratio about 0.65. Under these conditions, the force  $F$  can be simplified in terms of  $C$ , being the mean values of the flexibility factor,  $l_w$ , the wetted length of the leg and  $h$ , the dimple depth of the four legs, with given liquid properties.

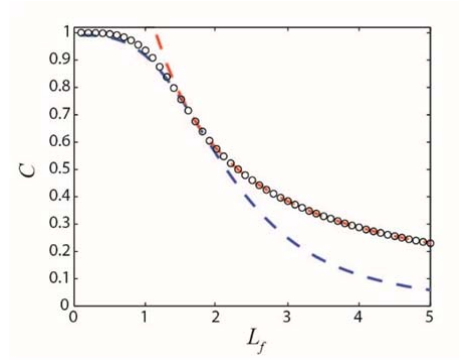

24  
 25  
 26  
 27  
 28  
 29  
 30  
 31  
 32

**Supplementary Figure 2. Flexibility factor** A flexibility factor  $C$  of a long thin flexible cylinder as a function of the scaled length  $L_f$ . Circles correspond to the numerically calculated values of  $C$ ; the blue dashed line  $C = (1 + 0.082L_f^{3.3})^{-1}$ , and the red dashed line  $C = (1.15L_f)^{-1}$ . The blue dashed line is used in this study for  $L_f < 2$ .

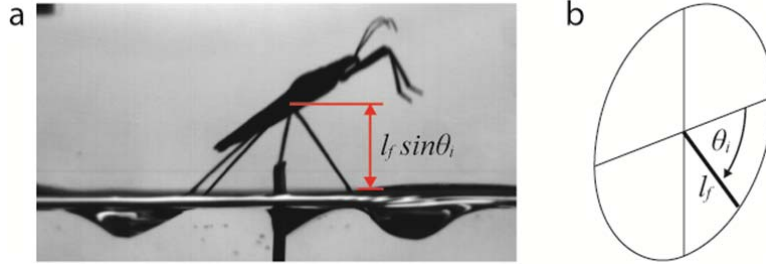

33  
 34  
 35  
 36  
 37  
 38  
 39  
 40

**Supplementary Figure 3. Angle of rotation of a water strider's leg** (a) The instantaneous vertical length of femur. (b) The angle of a leg  $\theta_i$  in a plane of leg rotation with respect to the horizontal plane. The thick solid line indicates the femur, and the tired circle means the plane of leg rotation.

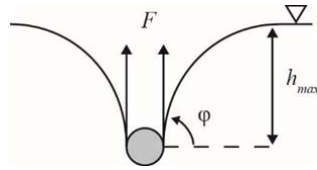

41  
42  
43  
44  
45  
46  
47  
48

**Supplementary Figure 4. Theoretical sinking depth of a cylinder** The maximum deformation of the meniscus due to a thin rigid cylinder floating on a surface of the liquid, with the interfacial inclination  $\varphi$  and the displacement of cylinder  $h_{max}$ .

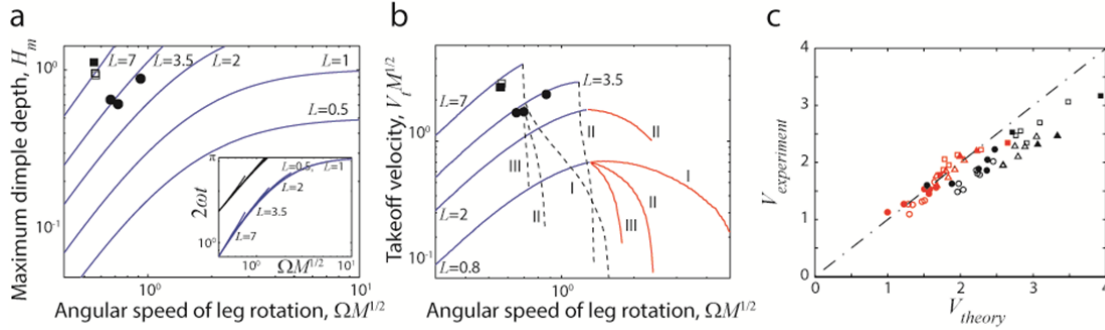

49  
50  
51  
52  
53  
54  
55  
56  
57  
58  
59  
60  
61  
62  
63  
64  
65  
66  
67  
68  
69  
70  
71  
72  
73

**Supplementary Figure 5. The model predicts maximal dimple depth and take-off velocity**  
 (a) Predicted and observed effect of the dimensionless index  $\Omega M^{1/2}$ , representing largely variation in leg rotation, on the dimensionless maximum dimple depth ( $H_m$ ) across a range of the dimensionless maximal reach of the leg ( $L$ ). (Inset:  $\omega t$  versus  $\Omega M^{1/2}$  at which meniscus reaches maximum depth (at  $t = t_m$ ; blue lines), and the end of propulsion (at  $t = t_e$ ; black lines).) (b) Predicted and observed effect of the dimensionless index  $\Omega M^{1/2}$ , representing largely variation in leg rotation, on the take-off velocity index ( $V_t M^{1/2}$ ) for various  $L$  through the jump modes of post-takeoff closing (blue solid lines), pre-takeoff closing (red solid lines), and meniscus breaking (black dashed lines). The lines marked with roman numbers indicate the different dimensionless body mass  $M$  (I,  $M = 0.1$ ; II,  $M = 0.5$ ; III,  $M = 2.0$ ). (c) Experimentally measured, dimensionless vertical velocity of water striders versus theoretical predictions at the moment of maximum dimple depth (red symbols) and takeoff (black symbols). Dashed dot line indicates the exact match between experiment and theory. In (a) and (b), the empirical values from water striders with  $L \approx 3.5$  (circles; *G. latiabdominis*) and  $L \approx 7$  (squares; *A. paludum*) are given. In (c), the empirical results from the jump characteristics of females (filled symbols) and males (unfilled symbols) of *G. latiabdominis* (circles), *G. gracilicornis* (triangles), and *A. paludum* (squares) are plotted. Overestimation of takeoff velocity in (c) may come from the delay of retraction of the water surface in the closing stage of real jump<sup>1</sup>. Dimples remaining after the legs completely take off the water surface in Fig. 1e ( $t = 25$  ms) imply that the water surface retracts slower than the legs escaping from the water surface. Therefore, dimple depth would not reflect the exact capillary force supporting the legs but exaggerate it in the closing stage.

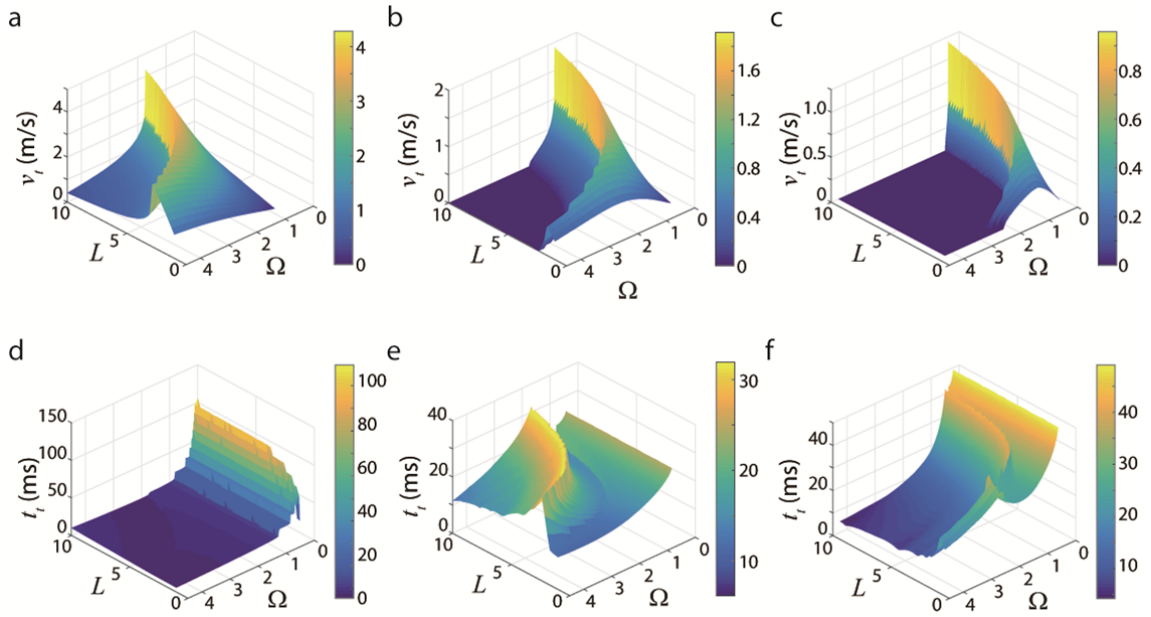

74  
75  
76  
77  
78  
79  
80  
81  
82

**Supplementary Figure 6. Vertical takeoff velocity estimation** Theoretical predictions of takeoff velocity (a to c) and the time to escape from water (d to f) with different dimensionless parameters  $M$ ,  $L$ , and  $\Omega$ . The figures are 3-dimensional representations of Fig. 4(a to f) with the same labels.

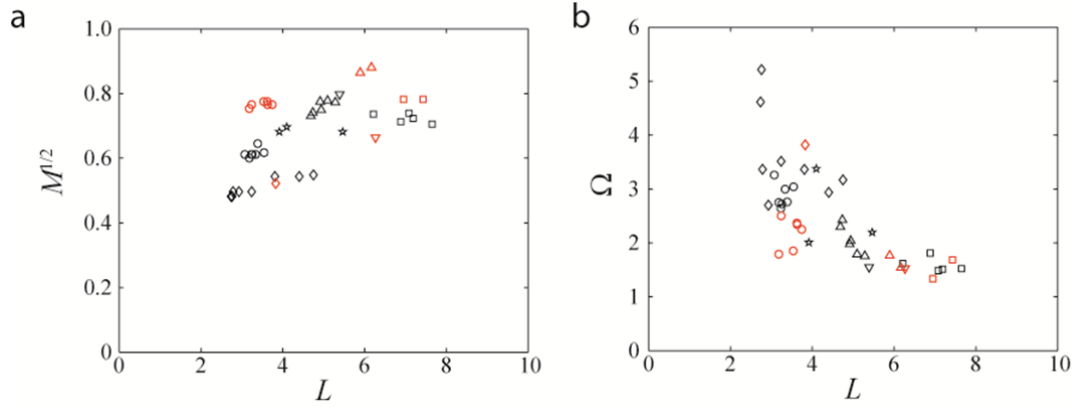

83  
84  
85  
86  
87  
88  
89  
90  
91  
92  
93

**Supplementary Figure 7. Empirical values of  $M^{1/2}$  and  $\Omega$**  The two elements of the variable  $\Omega M^{1/2}$ , as a function of the morphological variable  $L$ . **(a)** Distribution of the square root of the dimensionless body mass of water striders  $M^{1/2}$  obtained from experiment with respect to dimensionless downward stroke  $L$ . **(b)** Distribution of dimensionless angular velocity of leg rotation of water striders obtained from experiment  $\Omega$  with respect to dimensionless maximal reach of the leg  $L$ . The symbols indicate jump characteristics of females (black symbols) and males (red symbols) of *G. remigis* (inverted triangles), *G. comatus* (diamonds), *G. latiabdominis* (circles), *G. gracilicornis* (triangles), and *A. paludum* (squares), and nymph of *G. remigis* (stars).

94

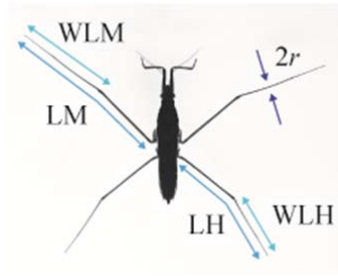

95

96

97

98

**Supplementary Figure 8. Definition of lengths of legs in Supplementary Table 1**

99

100



101 **Supplementary Table**

102

103 **Supplementary Table 1. Body dimensions of water striders used in this study (mean  $\pm$**   
 104 **standard deviation)**

| Species                     | Sex    | No.s of jumps/<br>individuals<br>filmed | No.s of individ-<br>uals measur-<br>ed | Body<br>mass<br>(mg) | Legnth<br>of<br>middle<br>leg<br>(mm) | Length<br>of hind<br>leg<br>(mm) | Wetted<br>length<br>of<br>middle<br>leg<br>(mm) | Wetted<br>length<br>of hind<br>leg<br>(mm) | Average<br>radius of<br>tibia<br>( $\mu$ m) |
|-----------------------------|--------|-----------------------------------------|----------------------------------------|----------------------|---------------------------------------|----------------------------------|-------------------------------------------------|--------------------------------------------|---------------------------------------------|
| Symbol**                    |        |                                         |                                        |                      | LM                                    | LH                               | WLM                                             | WLH                                        | <i>r</i>                                    |
| <i>Gerris remigis</i>       | male   | 4/2 *                                   | 1*                                     | 29.3                 | 20.0                                  | 16.6                             | 11.4                                            | 8.6                                        | 159                                         |
|                             | female | 1/1                                     | 1                                      | 41.8                 | 20.0                                  | 16.7                             | 11.2                                            | 8.6                                        | 165                                         |
|                             | nymph  | 3/2                                     | 2                                      | 23.2<br>$\pm$ 0.4    | 16.0 $\pm$<br>0.7                     | 12.2 $\pm$<br>0.4                | 8.9 $\pm$<br>0.5                                | 5.8                                        | 156 $\pm$ 3                                 |
| <i>Gerris comatus</i>       | male   | 5/3                                     | 5                                      | 11.5<br>$\pm$ 2.3    | 14.0 $\pm$<br>1.3                     | 10.1 $\pm$<br>1.3                | 8.0 $\pm$<br>0.8                                | 4.5 $\pm$<br>0.6                           | 96 $\pm$ 18                                 |
|                             | female | 1/1                                     | 1                                      | 10.3                 | 12.6                                  | 9.1                              | 7.4                                             | 4.0                                        | 88                                          |
| <i>Gerris latiabdominis</i> | male   | 7/4                                     | 4                                      | 14.7<br>$\pm$ 0.4    | 12.5 $\pm$<br>0.2                     | 9.3 $\pm$<br>0.2                 | 7.2 $\pm$<br>0.2                                | 4.4 $\pm$<br>0.2                           | 89 $\pm$ 2                                  |
|                             | female | 6/3                                     | 3                                      | 24.3<br>$\pm$ 1.2    | 13.3 $\pm$<br>0.2                     | 10.2 $\pm$<br>0.2                | 7.6 $\pm$<br>0.1                                | 4.9 $\pm$<br>0.2                           | 99 $\pm$ 2                                  |
| <i>Gerris gracilicornis</i> | male   | 6/6                                     | 6                                      | 29.0<br>$\pm$ 2.5    | 18.3 $\pm$<br>0.7                     | 13.3 $\pm$<br>0.5                | 9.9 $\pm$<br>0.5                                | 5.4 $\pm$<br>0.5                           | 131 $\pm$ 7                                 |
|                             | female | 2/2                                     | 2                                      | 48.5<br>$\pm$ 2.7    | 21.0 $\pm$<br>0.4                     | 16.5 $\pm$<br>0.1                | 11.4 $\pm$<br>0.5                               | 7.7 $\pm$<br>0.2                           | 143 $\pm$ 3                                 |
| <i>Aquarius paludum</i>     | male   | 5/5                                     | 5                                      | 37.7<br>$\pm$ 0.9    | 24.0 $\pm$<br>1.0                     | 21.0 $\pm$<br>1.2                | 12.7 $\pm$<br>0.5                               | 8.9 $\pm$<br>0.7                           | 130 $\pm$ 5                                 |
|                             | female | 2/1                                     | 1                                      | 49.0                 | 24.4                                  | 21.4                             | 13.2                                            | 9.1                                        | 142                                         |

105

106 \* In the case of one individual *G. remigis* male, we did not collect measurements because it escaped during  
 107 filming. In calculations for this individual *G. remigis* male we used the measurements collected from another  
 108 male, who was similar in size and morphology (was also filmed). For all remaining species/sexes we measured  
 109 every individual that was filmed (for some species we measured more individuals).

110

111 \*\* Corresponding symbols in Supplementary Fig. 8.

112

113

114

115 **Supplementary Notes**

116

117 **Supplementary Note 1. Verification of the assumption of four legs moving**  
118 **synchronously**

119

120 To model the vertical velocity of a water strider's centre of mass, the forces acting on its  
121 four legs were added. In the model, we assumed that all the legs involved in the propulsion  
122 move synchronously and leave the surface at the same time. This assumption is verified by  
123 correlation analysis between the moments the maximum dimple depth of middle and hind  
124 legs are reached in each trial, resulting in the correlation coefficient  $r = 0.943$ , p-value =  
125 0.0311, and  $df = 28$  (Supplementary Fig. 1a).

126 In addition, we used average values of wetted length and resulting dimple depth made by  
127 middle and hind legs. We exploit this simplification because equations of motion become  
128 tractable and the corresponding theoretical predictions are accurate enough. Supplementary  
129 Fig. 1b shows the verification of this simplification. The color map indicates the ratio of two  
130 forces (see Supplementary Note 2) fourfold of the force  $\bar{F}$  calculated with mean values of the  
131 wetted length  $\bar{l}_w$  and dimple depth  $\bar{h}$  of middle and hind legs to the sum of the forces on the  
132 four legs with different values of the wetted length and dimple depth of middle and hind legs:

133 
$$\frac{4\bar{F}}{\Sigma F} = \frac{4\bar{l}_w\bar{h}[1-(\bar{h}/2l_c)^2]^{1/2}}{\Sigma l_w h [1-(h/2l_c)^2]^{1/2}}. \quad (1)$$

134 The black dots show the measured value from jumping of water striders we observed when  
135 the legs reach the deepest position. The observed conditions have force ratios between 0.76  
136 and 1.15 implying that our simplification is reasonable, except for the three cases with the  
137 highest dimple depth ratio, where the maximum dimple depths made by hind legs were below  
138 1 mm and the resulting force ratio about 0.65. Under these conditions, the force  $F$  can be  
139 simplified in terms of  $C$ , being the mean values of the flexibility factor,  $l_w$ , the wetted length  
140 of the leg and  $h$ , the dimple depth of the four legs, with given liquid properties.

141

142

143 **Supplementary Note 2. Capillary force on a leg**

144

145 Since water strider legs bend during a jump, the flexibility of the cylinder needs to be taken  
146 into account in modeling the force exerted on the legs. Vella<sup>2</sup> provided the numerical  
147 solutions of capillary force acting on a long thin flexible cylinder clamped horizontally at one  
148 end and held at a given depth under the free surface. According to the study, the capillary  
149 force on a rigid thin cylinder can be written as

150

151 
$$F_r = 2\rho g l_c l_w h \{1 - [h/(2l_c)]^2\}^{1/2}, \quad (2)$$

152

153 where  $l_w$  denotes the wetted length of the cylinder.  $F_r$  monotonically increases with the depth  
154 of dimple  $h$  while  $h < \sqrt{2}l_c$ . For a flexible cylinder, the scaled length  $L_f = l_w/l_{ec}$  plays an  
155 important role, where  $l_{ec} = (Bl_c/\sigma)^{1/4}$  is the modified elasto-capillary length of the cylinder  
156 with bending rigidity  $B = \pi E r^4/4$ . Here  $E$  corresponds to Young's modulus of insect's cuticle  
157 and  $r$  is the radius of leg. Vella presented the numerical solutions of supporting force on bent  
158 cylinders with various  $L_f$  revealing that flexibility hardly changes the shapes of the force  
159 curves with different depth, but decreases the magnitude of the force quantitatively. In other  
160 words, more flexible cylinders having larger  $L_f$  generate weaker supporting forces.

161 To transform the numerical solutions into more practical forms, here we suggest an  
 162 approximate force equation by introducing a flexibility factor  $C$  of the cylinder as a function  
 163 of  $L_f$ . Then the capillary force on a flexible cylinder is simply estimated as

$$164 \quad F = 2\rho g l_c C l_w h \{1 - [h/(2l_c)]^2\}^{1/2}. \quad (3)$$

165  
 166 As a result, the effective wetted length becomes  $C l_w$  because it replaces  $l_w$  in the formula of  
 167  $F_r$  for a rigid cylinder.  $C$  of each  $L_f$  was calculated by averaging the ratios of the numerical  
 168 solution of the capillary force on a flexible cylinder to the asymptotic solution of that on a  
 169 rigid cylinder as the dimple depth  $h$  varies from 0 to  $\sqrt{2}l_c$ . Given standard liquid properties  
 170 and gravitational acceleration, we simplify  $C$  into a function of  $L_f$  using the curve fit  $C \approx (1 +$   
 171  $0.082L_f^{3.3})^{-1}$  for  $L_f < 2$  or  $C \approx (1.15L_f)^{-1}$  for  $L_f > 2$  (Supplementary Fig. 2). The factor  $C$   
 172 decreases with  $L_f$ , implying weaker capillary force on the more flexible cylinder. To calculate  
 173 flexibility factor of water striders, we used the relationship  $C \approx (1 + 0.082L_f^{3.3})^{-1}$  as indicated  
 174 by blue dashed line in Supplementary Fig. 2, since all the water striders tested have the scaled  
 175 length  $L_f$  shorter than 1.5.  
 176

### 177 178 179 **Supplementary Note 3. The measurement of rotation angle**

180 The angle of legs  $\theta$  was calculated by averaging the angle of each leg  $\theta_i$  with respect to the  
 181 horizontal plane of a water strider from the video. The angle of each leg  $\theta_i$  was obtained by  
 182 measuring the instantaneous vertical length of femur,  $l_f \sin\theta_i$ , with given length of femur  $l_f$ , as  
 183 shown in Supplementary Fig. 3.  
 184

### 185 186 **Supplementary Note 4. The critical depth of meniscus breaking**

187  
 188 We observed several cases in which a leg quickly sank under the water surface after the  
 189 distal end of the leg pierced the meniscus during the stroke. In these cases, the capillary force  
 190 on the leg could be neglected upon penetration of meniscus because of the rapid decrease of  
 191 the wetted length. This water surface piercing can be predicted from the theoretical  
 192 calculations for rigid cylinders<sup>2-4</sup>: the maximum displacement of the centre of a thin rigid  
 193 cylinder at the gas-liquid interface before sinking is modeled to be reached at an interfacial  
 194 inclination  $\varphi$  of  $\pi/2$  and the displacement of cylinder ( $h_{max}$ ) of  $\sqrt{2}l_c$ , as illustrated in  
 195 Supplementary Fig. 4. The average depth reached by the distal end of the legs and by the  
 196 lowest parts of the legs upon the surface penetration (corresponding to the depth of dimple at  
 197 the moment of penetration) were 3.72 and 4.40 mm, respectively. Both the values are  
 198 comparable to the maximum theoretical depth of a floating rigid cylinder ( $\sqrt{2}l_c$ , 3.84 mm for  
 199 water). Therefore, in the model, we take  $\sqrt{2}l_c$  as the critical depth  $h_{max}$  under which the  
 200 surface penetration would occur. In addition, we note that the maximum depth limit is  
 201 equivalent to the maximum force limit<sup>1</sup>, or the force per unit wetted length  $f$  should satisfy  $f <$   
 202  $2\sigma$ , because capillary force on a leg is determined by the dimple depth<sup>2,3</sup>.  
 203  
 204

### 205 **Supplementary Note 5. The model predicts maximal dimple depth observed in insects**

206 We solved equation (3) in the main text and plotted the theoretically predicted maximum  
 207 dimple depth as a function of the dimensionless maximal reach of the leg  $L$   
 208 (femur+tibia+tarsus) and dimensionless index combining angular velocity of leg rotation,

209 body mass and tibia plus tarsus length  $\Omega M^{1/2}$  in Supplementary Fig. 5a, which reflects  
 210 morphological and behavioural trait, respectively. Strictly speaking,  $\Omega M^{1/2}$  is a function of  
 211 behaviour ( $\Omega = \omega(l_c/g)^{1/2}$ ) and morphology (a function of body mass and the length of  
 212 tibia+tarsus;  $M = m/\rho l_c^2 C l_t$ ). But, for a given species-specific morphology ( $M$ ) the variation in  
 213  $\Omega M^{1/2}$  represents behavioural variation in angular velocity of the legs. Additionally, for  
 214 among-species comparisons, a unit change in morphology affects  $\Omega M^{1/2}$  less than a unit  
 215 change in  $\Omega$  does, justifying our approximate view of  $\Omega M^{1/2}$  as largely a behavioural index  
 216 (See Supplementary Note 8, and Supplementary Fig. 7 for more explanations).  
 217 The maximum dimple depth increases with the increasing  $\Omega M^{1/2}$  or with the increasing  $L$ , for  
 218 an individual water strider with given  $m$ ,  $l_t$ , and  $C$ , and then it tends to converge to  $L$ . This  
 219 asymptotic maximum dimple depth corresponds to the stroke with extremely high speed  
 220 without any upward displacement of the body. However, the dimple depth  $H$  can grow only  
 221 until the meniscus breaks<sup>3, 4</sup> (see Supplementary Fig. 4 and Supplementary Note 4). The  
 222 predictions match empirical results, as exemplified in Supplementary Fig. 5a for two water  
 223 strider species (*G. latiabdominis* and *A. paludum*).

### 224 225 226 **Supplementary Note 6. The model predicts take off velocity observed in insects**

227 Takeoff velocity of a water strider is obtained via integrating the instantaneous net force on  
 228 the body, which depends on the dimple depth, over time until the end of legs reach the zero  
 229 depth position ( $t = t_i$ ). Supplementary Fig. 5b presents the predicted dimensionless takeoff  
 230 velocity  $V_i = v_i(g l_c)^{-1/2}$  multiplied by  $M^{1/2}$  with different  $\Omega M^{1/2}$  and  $L$ . As the water strider's  
 231 stroke with given morphology becomes gradually faster, the mode of jump switches from  
 232 post-takeoff closing jump to pre-takeoff closing or meniscus breaking jump depending on the  
 233 maximal reach of the leg  $L$ . For the long maximal reach ( $L > \sqrt{2}$ ), the takeoff velocity  
 234 sharply drops as  $\Omega M^{1/2}$  exceeds a certain critical value because of the rupture of meniscus.  
 235 For pre-takeoff closing jump or meniscus breaking jump,  $V_i$  varies with  $M$  because the insect  
 236 would go into a free fall after closing of legs or meniscus breaking. Meniscus breaking jump  
 237 is less beneficial because the support from the water surface is not strong in the late stage of  
 238 jump. This may cause not only the drag when the submerged legs rise but also destabilization  
 239 of the takeoff trajectory by various disturbances, such as wind gusts or other environmental  
 240 effects, to which small animals like water striders may be susceptible. Moreover, during the  
 241 time between the instant of meniscus breaking  $t_b$  or the end of closing of the legs  $t_c$  and the  
 242 instant of takeoff  $t_i$  of meniscus breaking jump or pre-takeoff close jump, the insect is almost  
 243 in a free fall resulting in the decrease in takeoff velocity ( $V_i M^{1/2} = [V(t_b)^2 M - 2H(t_b)M]^{1/2}$  or  
 244  $[V(t_c)^2 M - 2H(t_c)M]^{1/2}$ ) because of a lack of supporting force. We have verified that the  
 245 theoretical predictions of takeoff velocity calculated with the measured  $L$  and  $\Omega M^{1/2}$  agree  
 246 reasonably well with the experimental measurements on five species of water striders (see  
 247 Supplementary Fig. 5c).

### 248 249 250 **Supplementary Note 7. Three dimensional graphs of theoretical results of takeoff** 251 **velocity and latency**

252  
253 Supplementary Fig. 6 shows the three dimensional graphical representation of Fig. 4a to f.  
 254 In Supplementary Fig. 6a-c, the 3D versions of these prediction for maximal speed  
 255 effectively show the dramatic decrease in performance after the surface breaking threshold is  
 256 reached. In Supplementary Fig. 6d to f, the 3D versions of these predictions effectively show  
 257 a very narrow range of low  $t_i$  in the area just below the meniscus-breaking threshold.

258  
 259  
 260  
 261  
 262  
 263  
 264  
 265  
 266  
 267  
 268  
 269  
 270  
 271  
 272  
 273  
 274  
 275  
 276  
 277  
 278  
 279  
 280  
 281  
 282  
 283  
 284  
 285  
 286  
 287  
 288

**Supplementary Note 8. Variation in  $\Omega M^{1/2}$  as an index of variation in the leg rotation velocity**

In this study, there are three important parameters to explain the water striders' jumping performance on water, dimensionless angular speed of leg rotation  $\Omega = \omega(l_c/g)^{1/2}$ , dimensionless body mass  $M = m/(\rho l_c^2 Cl_t)$ , and dimensionless maximal reach of the leg  $L = \Delta l/l_c$ . However, in the final model predictions (Fig. 4g of the main text) the results are presented in the two dimensional space of  $\Omega M^{1/2}$  and  $L$ . The values of water striders' dimensionless angular velocity of leg rotation,  $\Omega$ , extracted from the videos varied within an approximate range of [1.2–5.5], while dimensionless body mass  $M$  varied only within an approximate range of [0.25–0.85]. But, the square root of dimensionless body mass,  $M^{1/2}$ , varied even less (Supplementary Fig. 7). Therefore, variation in  $\Omega M^{1/2}$  can be treated as an indicator of variation in the leg rotation  $\Omega$  rather than mass  $M$ . Additionally, it seems that water striders with longer dimensionless maximal reach of the leg  $L$  used slower leg rotation  $\Omega$ , (Supplementary Fig. 7b), and that the analogical association between  $L$  and  $M^{1/2}$  (Supplementary Fig. 7a) was not as clear as between  $L$  and  $\Omega$ .

**Supplementary Note 9. Simplified relation between  $L$  and  $\Omega M^{1/2}$**

Equation (2) in the main text can be rewritten as  $v = v_s$  at  $t = t_m$ , where  $v = \frac{1}{m} \int_0^{t_m} F dt$ ,  $F = 8\rho g l_c Cl_w h \{1 - [h/(2l_c)]^2\}^{1/2}$  and  $v_s = \omega \Delta l \sin(2\omega t)$ , because when the legs reach the deepest position, the rate of dimple growth  $dh/dt$  becomes zero. With rough approximations of  $h \sim Ut$ ,  $U \sim h_m/t_m$ ,  $h_m \sim l_c$ , and  $F \sim \rho g l_c Cl_t h$ ,  $v$  at  $t = t_m$  can be simplified to  $v \sim \frac{\rho g l_c Cl_t}{\omega m} \int_0^{\omega t_m} \frac{l_c \omega t}{\omega t_m} d\omega t \sim \rho g l_c^2 Cl_t \omega t_m / (\omega m)$ . Then, by balancing this relation with  $v_s$ , we can get the relation  $\Delta l \sim (\rho g l_c^2 Cl_t \omega t_m) / [\omega^2 m \sin(2\omega t_m)]$ , which can be further simplified to  $\Delta l \sim (\rho g l_c^3 Cl_t)^{1/2} / (\omega m^{1/2})$  by substituting  $\omega t_m \sim \Omega M^{1/2}$  and  $\sin(2\omega t_m) \sim 1$  (see the inset of Supplementary Fig. 5a). Thus, we get  $L \sim \Omega^{-1} M^{1/2}$ .

289 **Supplementary References**

290

291 1. Koh, J.-S. *et al.* Jumping on water: Surface tension-dominated jumping of water striders and  
292 robotic insects. *Science* **349**, 517-521 (2015).

293 2. Vella, D. Floating objects with finite resistance to bending. *Langmuir* **24**, 8701-8706 (2008).

294 3. Vella, D., Lee, D. G. & Kim, H.-Y. The load supported by small floating objects. *Langmuir* **22**,  
295 5979-5981 (2006).

296 4. Shi, F. *et al.* Towards understanding why a superhydrophobic coating is needed by water striders.  
297 *Adv. Mater.* **19**, 2257-2261 (2007).
